# Supplementary material for: On the Hunt for New Toxin Families Produced by a Mediterranean Strain of the Benthic Dinoflagellate Ostreopsis cf. ovata
Source: MDPI journal article supplement (doi:10.3390/toxins14040234), 2022-03-23
Supplement: s1 [file s1]

Article

# On the Hunt for New Toxin Families Produced by a Mediterranean Strain of the Benthic Dinoflagellate *Ostreopsis cf. ovata*

Eva Ternon, Evgenia Glukhov, Emily Trytten, Rodolphe Lemée and William Gerwick

**Table S1.** Overall summary of NCI-H460 cell line concentration-response curves including CC<sub>50</sub> and R<sup>2</sup> values ( $\geq 0.89$ ) for each curve. Cell cytotoxicity values are expressed in  $\mu\text{g/mL}$ .

| COMPOUND ID    | A        | B        | C        | AVG, $\mu\text{g/mL}$ | error, $\mu\text{g/mL}$ | % ERROR   | R2 A   | R2 B   | R2 C   |
|----------------|----------|----------|----------|-----------------------|-------------------------|-----------|--------|--------|--------|
| <b>OF6-2</b>   | 5.65E-01 | 7.20E-01 | 7.46E-01 | <b>0.68</b>           | <b>0.10</b>             | <b>10</b> | 0.9711 | 0.9748 | 0.986  |
| <b>OF6-3</b>   | 1.41E+00 | 1.49E+00 | 1.32E+00 | <b>1.40</b>           | <b>0.08</b>             | <b>8</b>  | 0.9144 | 0.8721 | 0.96   |
| <b>OF6-6</b>   | 5.24E-01 | 8.38E-01 | 7.07E-01 | <b>0.69</b>           | <b>0.16</b>             | <b>16</b> | 0.9831 | 0.9686 | 0.9807 |
| <b>OF6-12</b>  | 3.06E+00 | 3.28E+00 | 3.04E+00 | <b>3.12</b>           | <b>0.13</b>             | <b>13</b> | 0.9468 | 0.981  | 0.9522 |
| <b>OF6-15</b>  | 1.12E+00 | 1.56E+00 | 1.16E+00 | <b>1.28</b>           | <b>0.24</b>             | <b>24</b> | 0.8853 | 0.9812 | 0.9449 |
| <b>OF6-18</b>  | 9.56E-01 | 6.80E-01 | 6.59E-01 | <b>0.76</b>           | <b>0.17</b>             | <b>17</b> | 0.9462 | 0.9801 | 0.9748 |
| <b>PLTX</b>    | 4.02E-05 | 5.34E-05 | 4.04E-05 | <b>4.5E-05</b>        | <b>7.6E-06</b>          | <b>0</b>  | 0.9907 | 0.9864 | 0.9665 |
| <b>OF6-MIX</b> | 1.58E-01 | 1.36E-01 | 1.26E-01 | <b>0.14</b>           | <b>0.02</b>             | <b>2</b>  | 0.9884 | 0.9908 | 0.9543 |
| <b>DOX</b>     | 1.49E-01 | 2.02E-01 | 1.87E-01 | <b>0.18</b>           | <b>0.03</b>             | <b>3</b>  | 0.9866 | 0.9728 | 0.9457 |

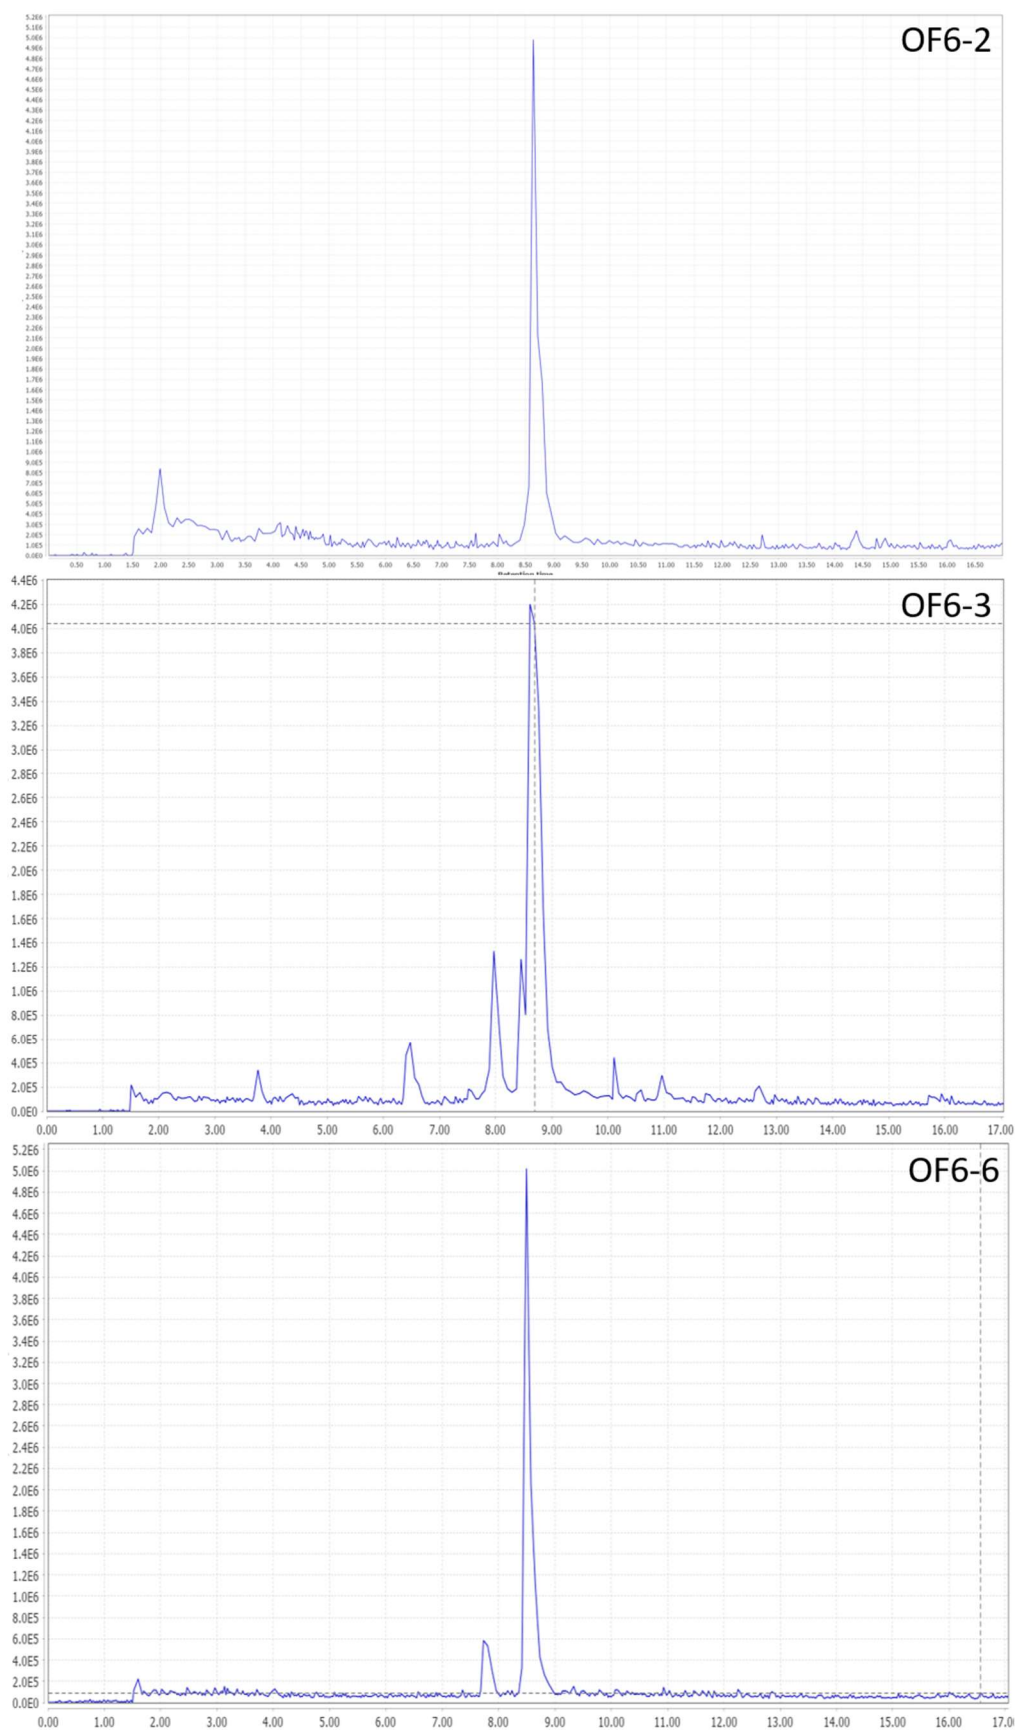

(A)

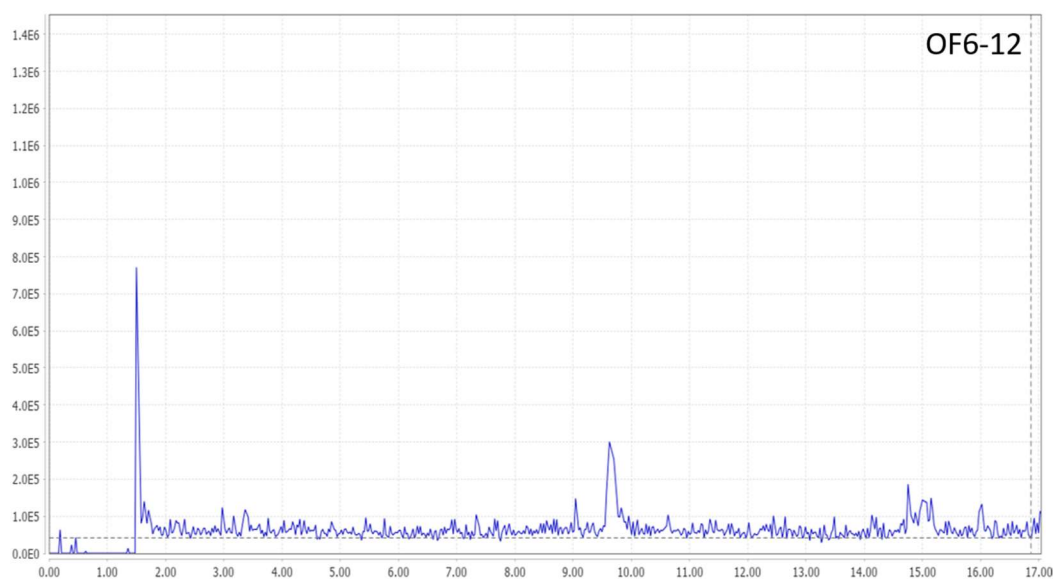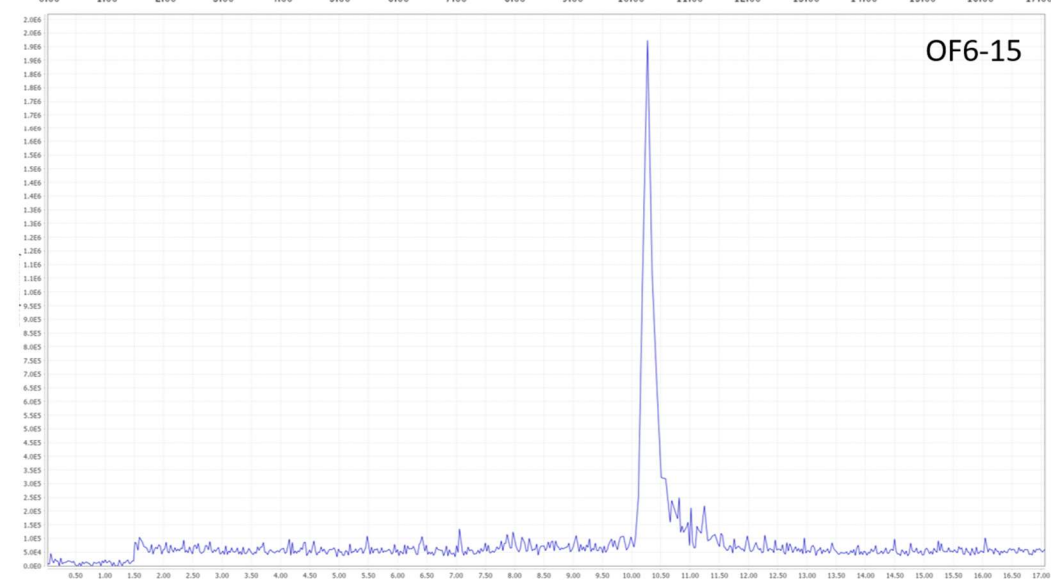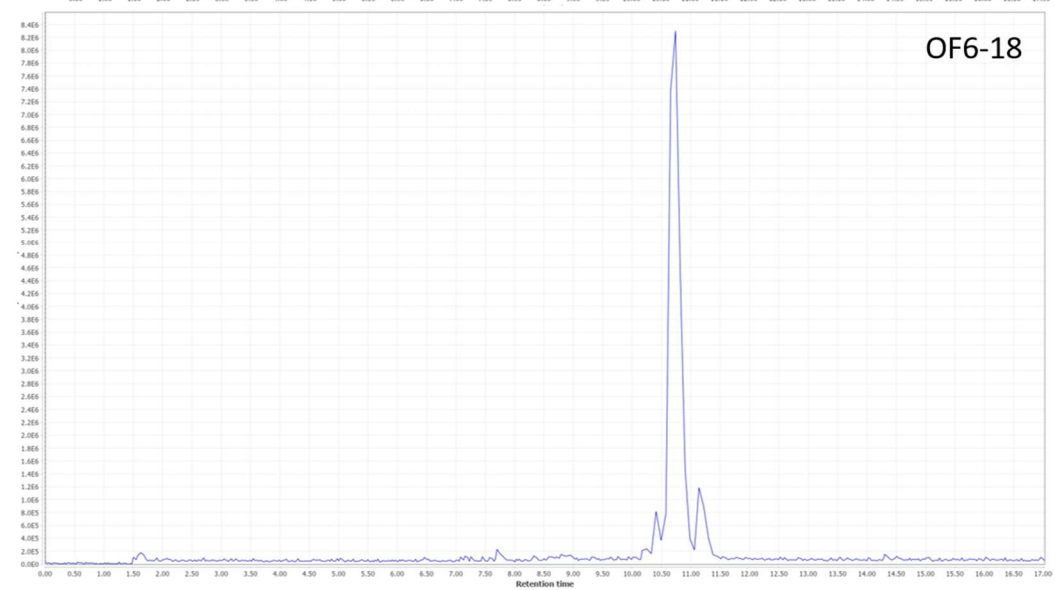

(B)

**Figure S1.** (A) Low-resolution mass spectra for the LGTX (top panel) and (B) the RVTX (bottom panel) acquired in the full scan positive mode.

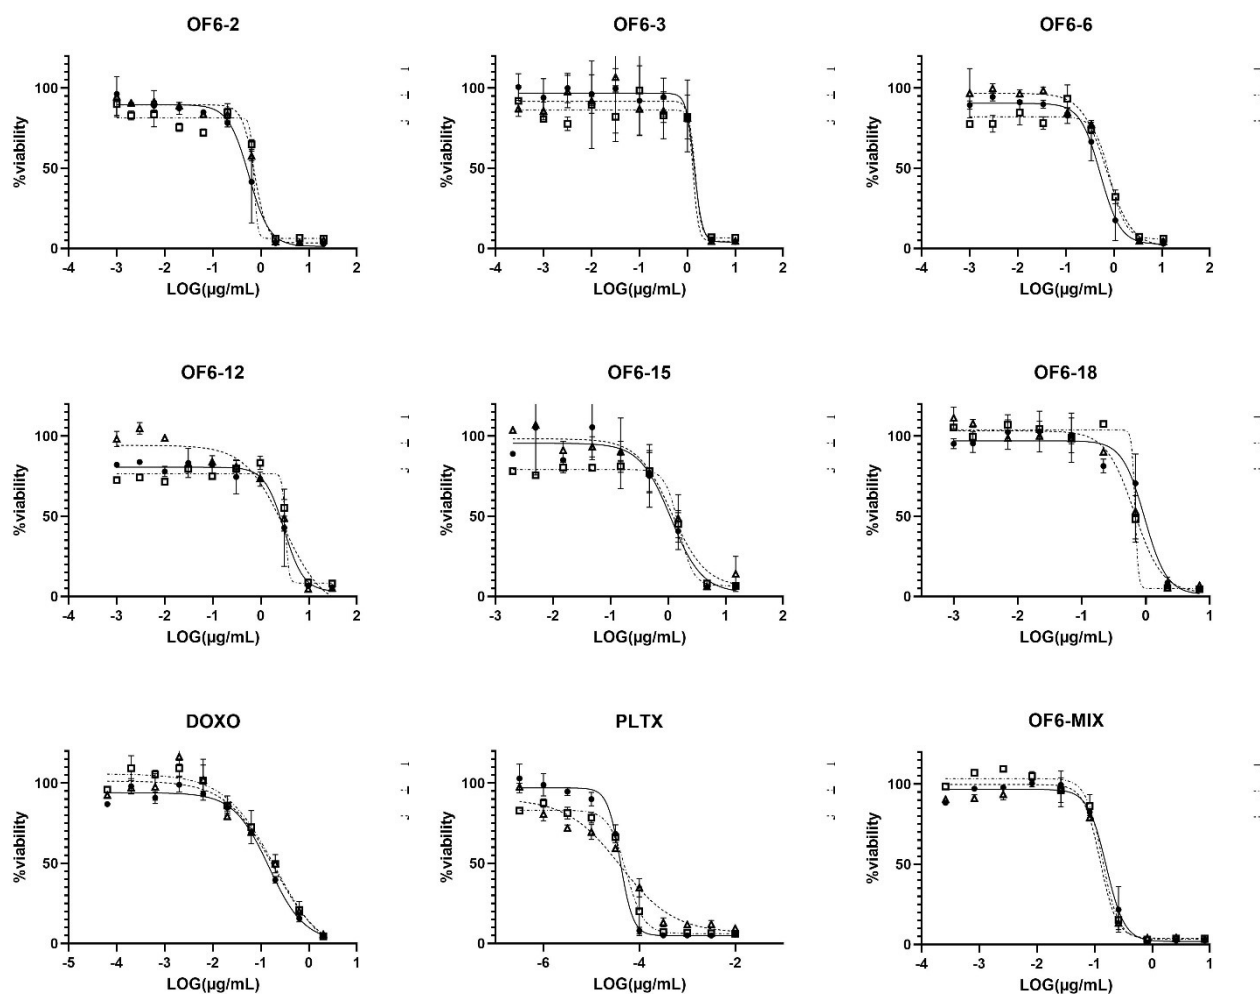

**Figure S2.** Concentration-response curves for all purified fractions of OF6-2 to 6 , LGTX (top panel) and the OF12-18, RVTX (second panel), as well as their mixture (OF6-MIX), PLTX and doxorubicin (positive control) (bottom panel), concentrations expressed as weights/volume ( $\mu\text{g/mL}$ ). Curves were created using log(inhibitor) vs. response -- Variable slope (four parameters) function prepared in GraphPad 9.3.1.
